# Supplementary material for: Understanding the mechanism of non-enzymatic glycation inhibition by cinnamic acid: an in vitro interaction and molecular modelling study
Source: Royal Society of Chemistry journal article supplement (doi:10.1039/c6ra12321j), 2016-01-01
Supplement: c6ra12321j1.pdf [file c6ra12321j1.pdf]

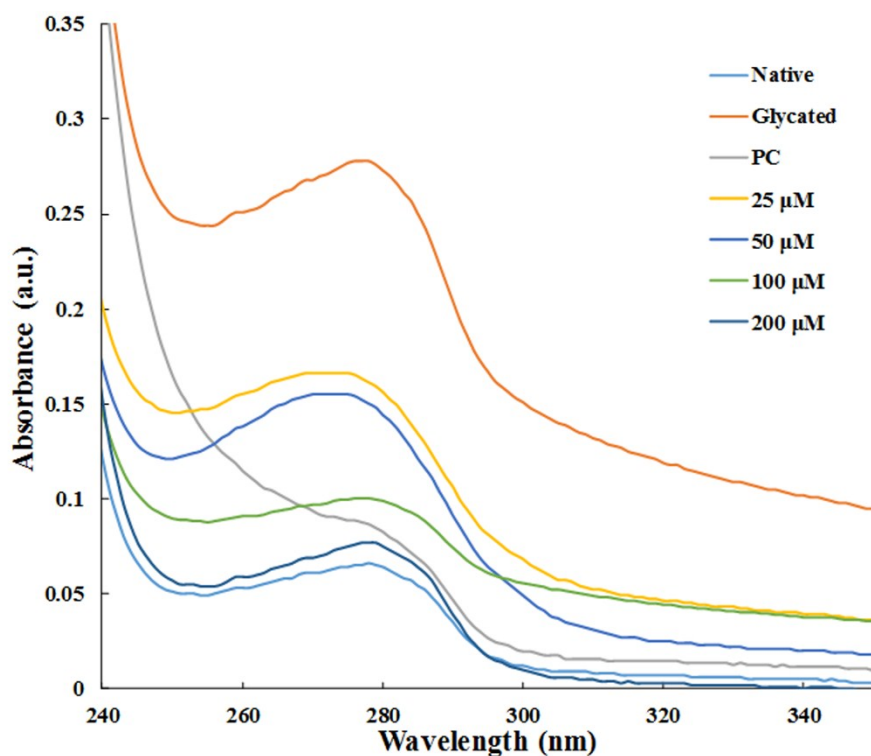

**Supplementary Fig. S1.** UV-visible spectra of native, glycosylated and treated HSA after 30 days. (PC is aminoguanidine treated). All the data have been expressed in mean  $\pm$  SEM for three independent experiments.

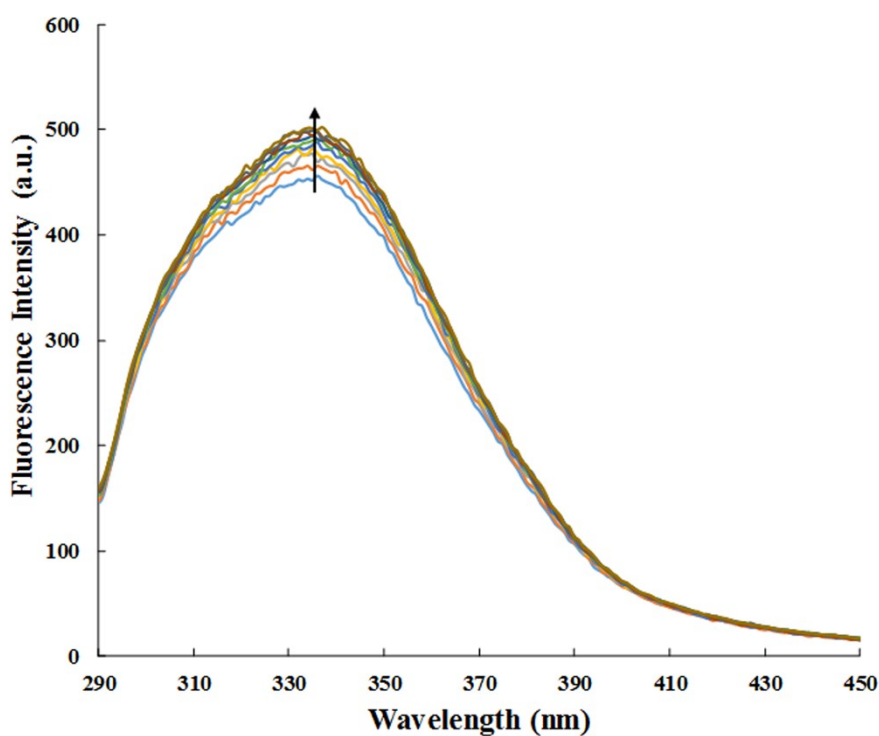

**Supplementary Fig. S2.** Fluorescence emission spectra of HSA-cinnamic acid complex with varying concentration (0-100 mM) of NaCl.
